# Supplementary material for: High-performance inverted organic light-emitting diodes with extremely low efficiency roll-off using solution-processed ZnS quantum dots as the electron injection layer
Source: Royal Society of Chemistry journal article supplement (doi:10.1039/c8ra10290b), 2019-01-01
Supplement: c8ra10290b1.pdf [file c8ra10290b1.pdf]

## Supporting Information

### High-performance Inverted Organic Light-emitting Diodes with Extremely Low Efficiency Roll-off using Solution-processed ZnS Quantum Dots as Electron Injection Layer

Guanjie Shi,<sup>a,b</sup> Xiaozheng Zhang,<sup>a</sup> Minqiang Wan,<sup>a</sup> Shuanglong Wang,<sup>b</sup> Hong Lian,<sup>b</sup>  
Run Xu,<sup>a</sup> Wenqing Zhu,<sup>a,b,\*</sup>

<sup>a</sup>School of Materials Science and Engineering, Shanghai University, Shanghai 200072,  
People's Republic of China

<sup>b</sup>School of Mechatronic Engineering and Automation, Key Laboratory of Advanced  
Display and System Applications, Ministry of Education, Shanghai University,  
Shanghai, 200072, China.

Corresponding Author

\*E-mail: wqzhu@shu.edu.cn

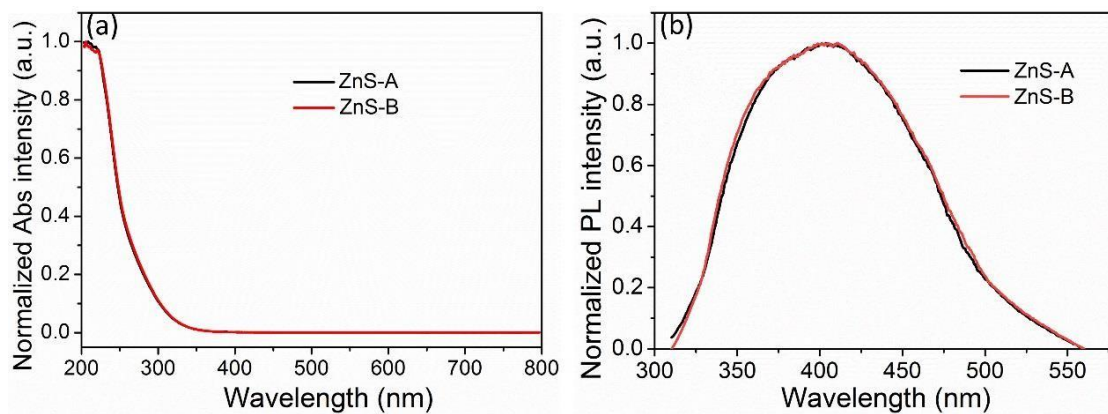

Figure S1. Absorption and Photoluminescence spectra of ZnS-A and ZnS-B film spin-coated on glass substrate.

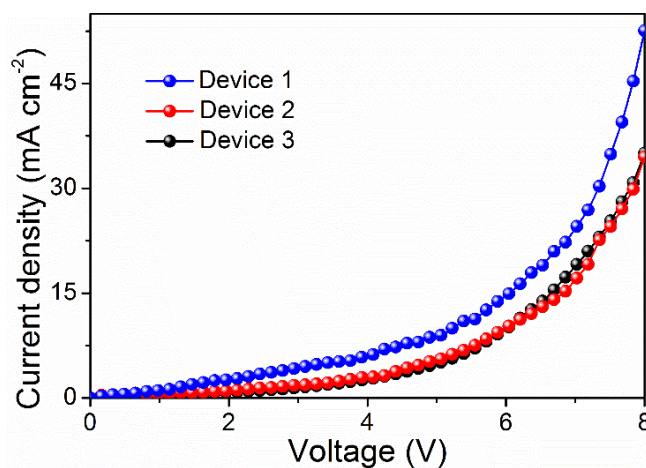

Figure S2. The current density-voltage characteristics of electron-only devices (EODs) 1, 2 and 3.

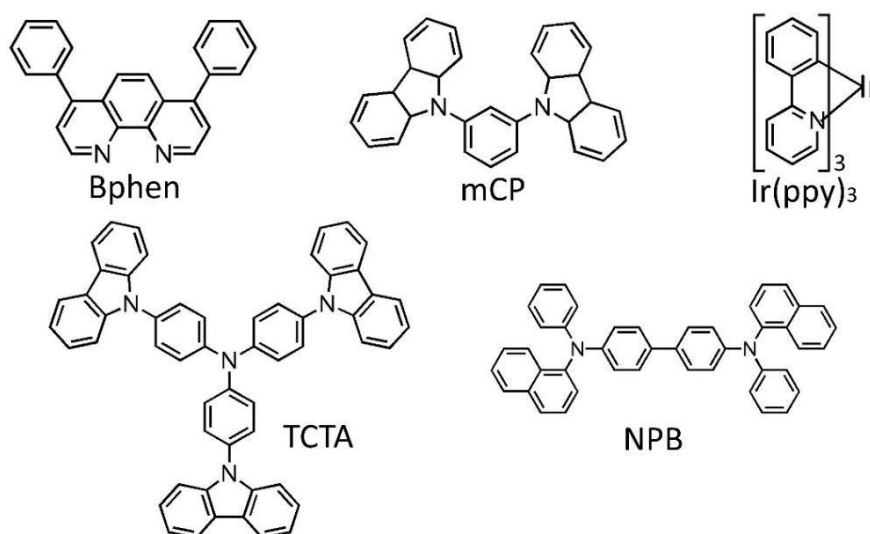

Figure S3. Chemical structures of the materials described in the inverted OLED devices

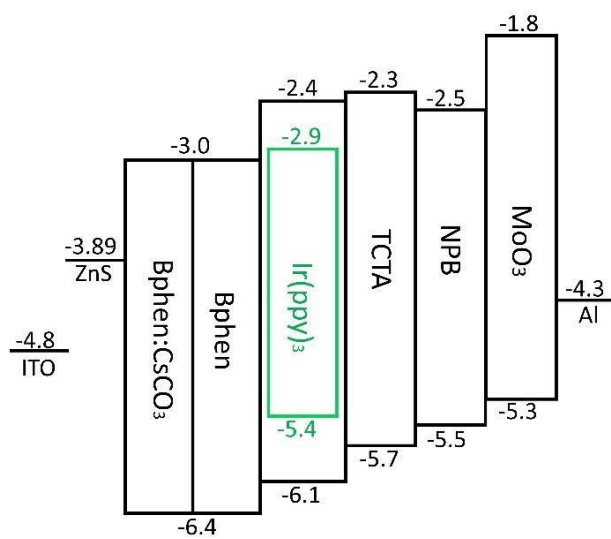

Figure S4. The corresponding energy level diagram of inverted OLED devices.
